# Supplementary material
Source: MDPI journal article supplement (https://www.mdpi.com/2073-4395/9/12/836)
Supplement: s1 [file s1]

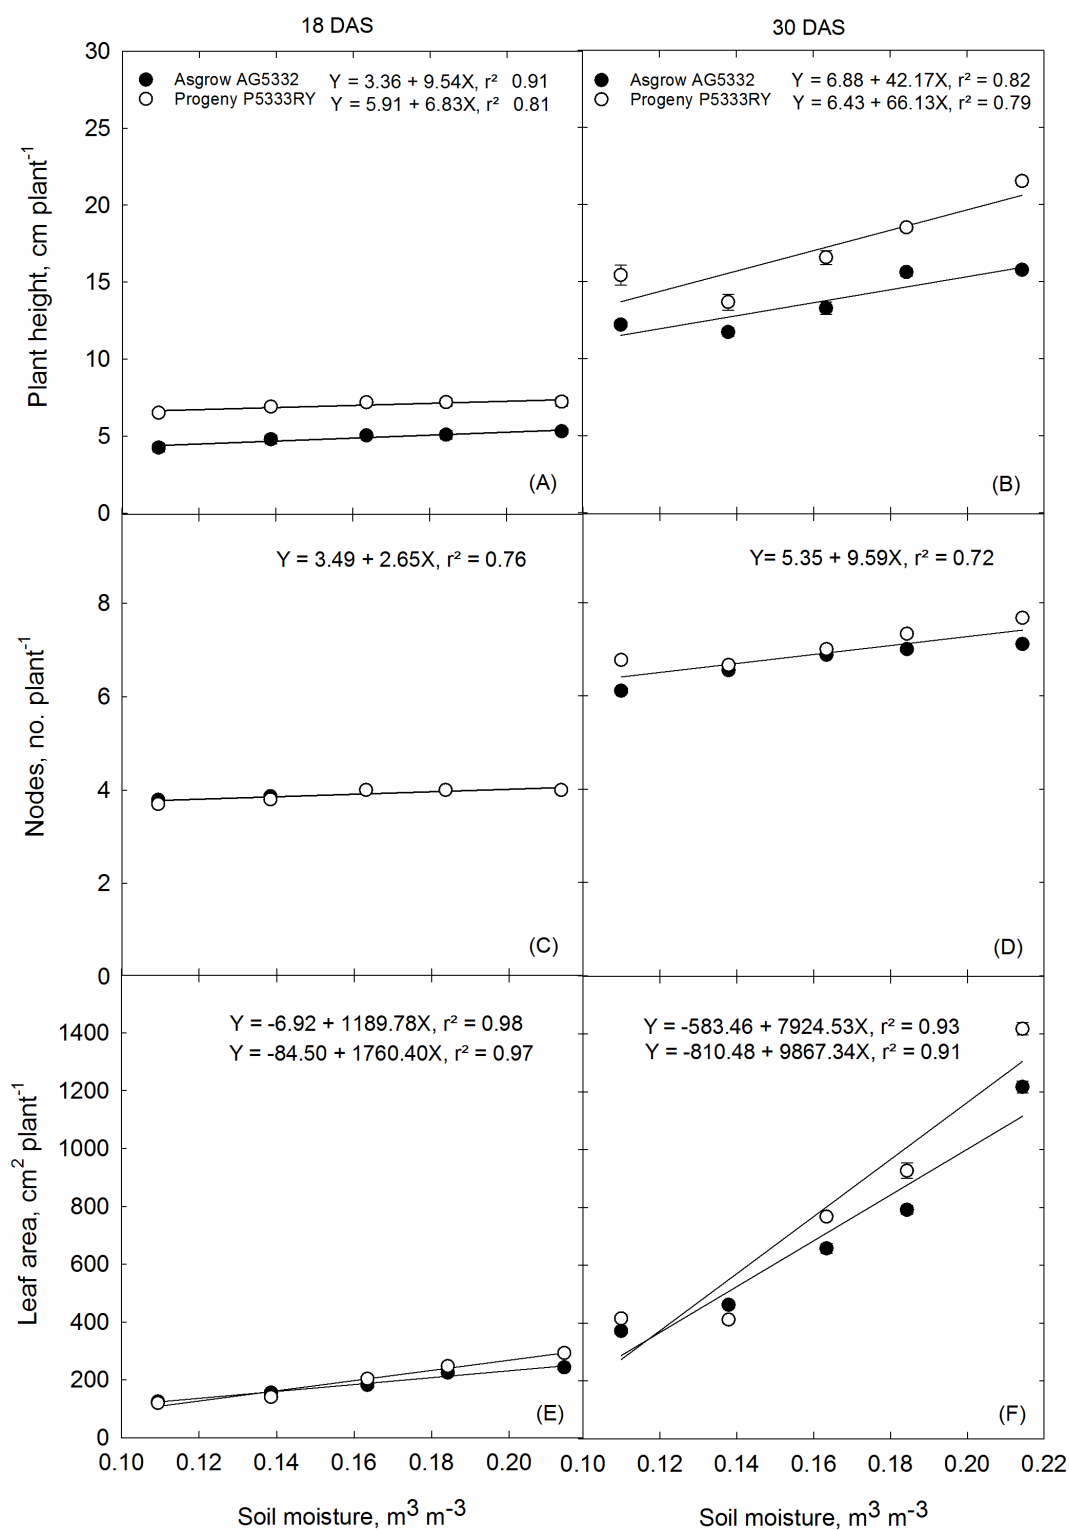

Table S1. Relationships between soil moisture and vegetative growth components measured at 18 and 30DAS. (A and B) plant height, (C and D) node numbers, (E and F) leaf area.

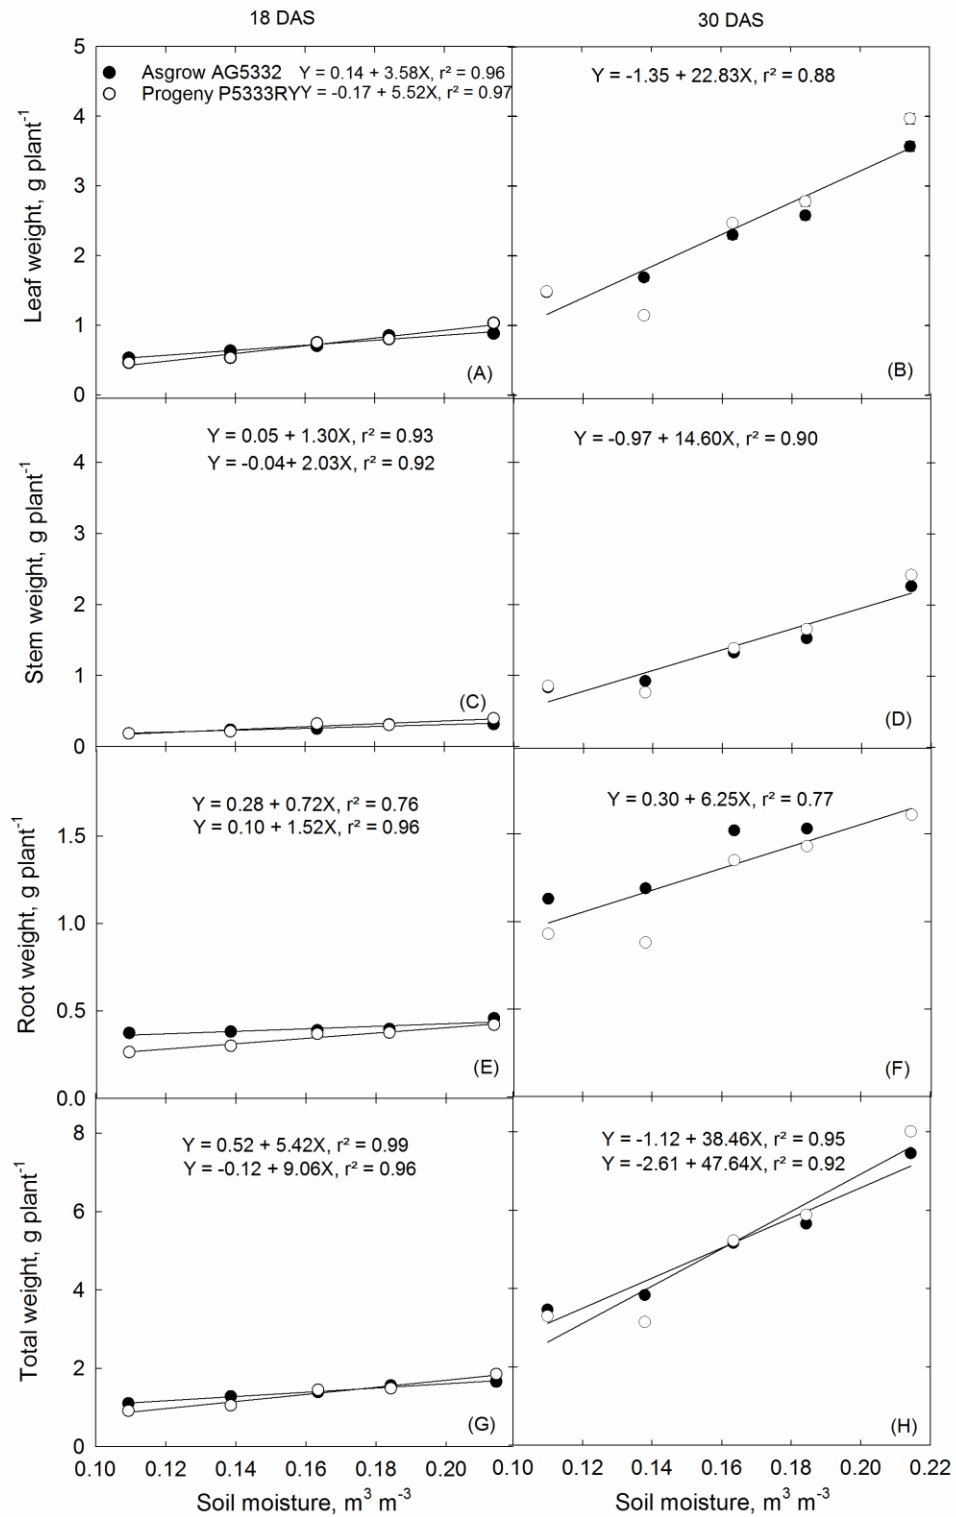

Table S2. Relationships between soil moisture and biomass components measured at 18 and 30DAS. (A and B) leaf weight, (C and D) stem weight, (E and F) root weight, (G and H) total weight.

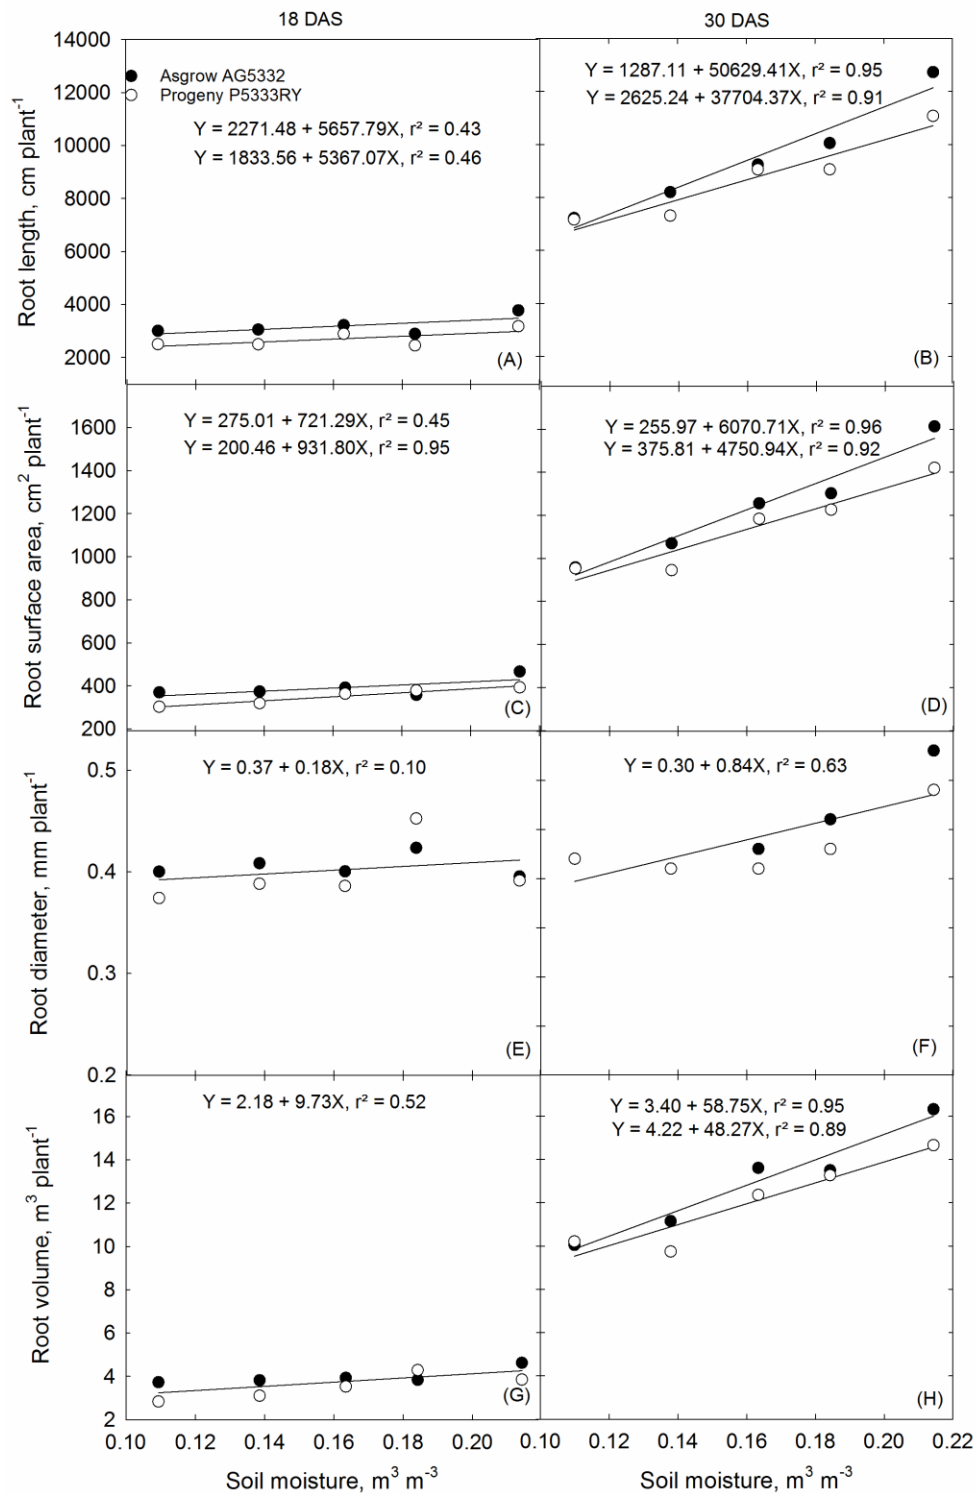

Table S3. Relationships between soil moisture and root growth parameters measured at 18 and 30DAS. (A and B) root length, (C and D) root surface area, (E and F) root diameter, (G and H) root volume.

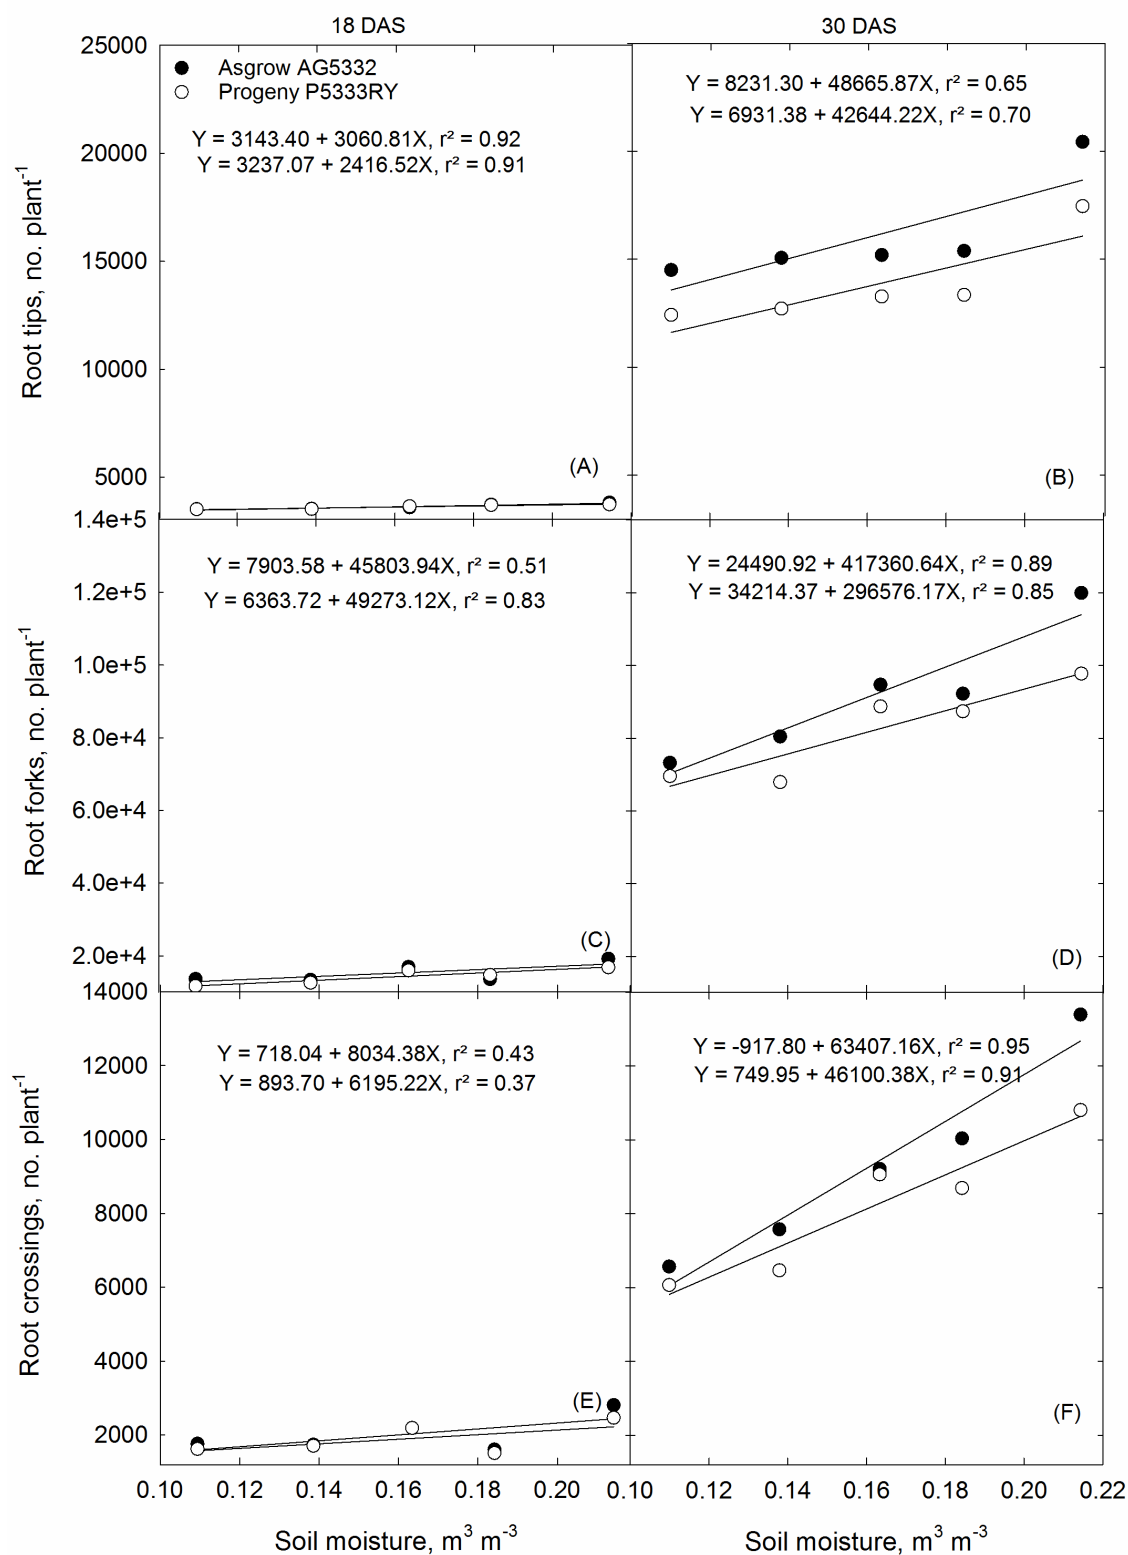

Table S4. Relationships between soil moisture and root developmental parameters measured at 18 and 30DAS. (A and B) root tips, (C and D) root forks, (E and F) root crossings.

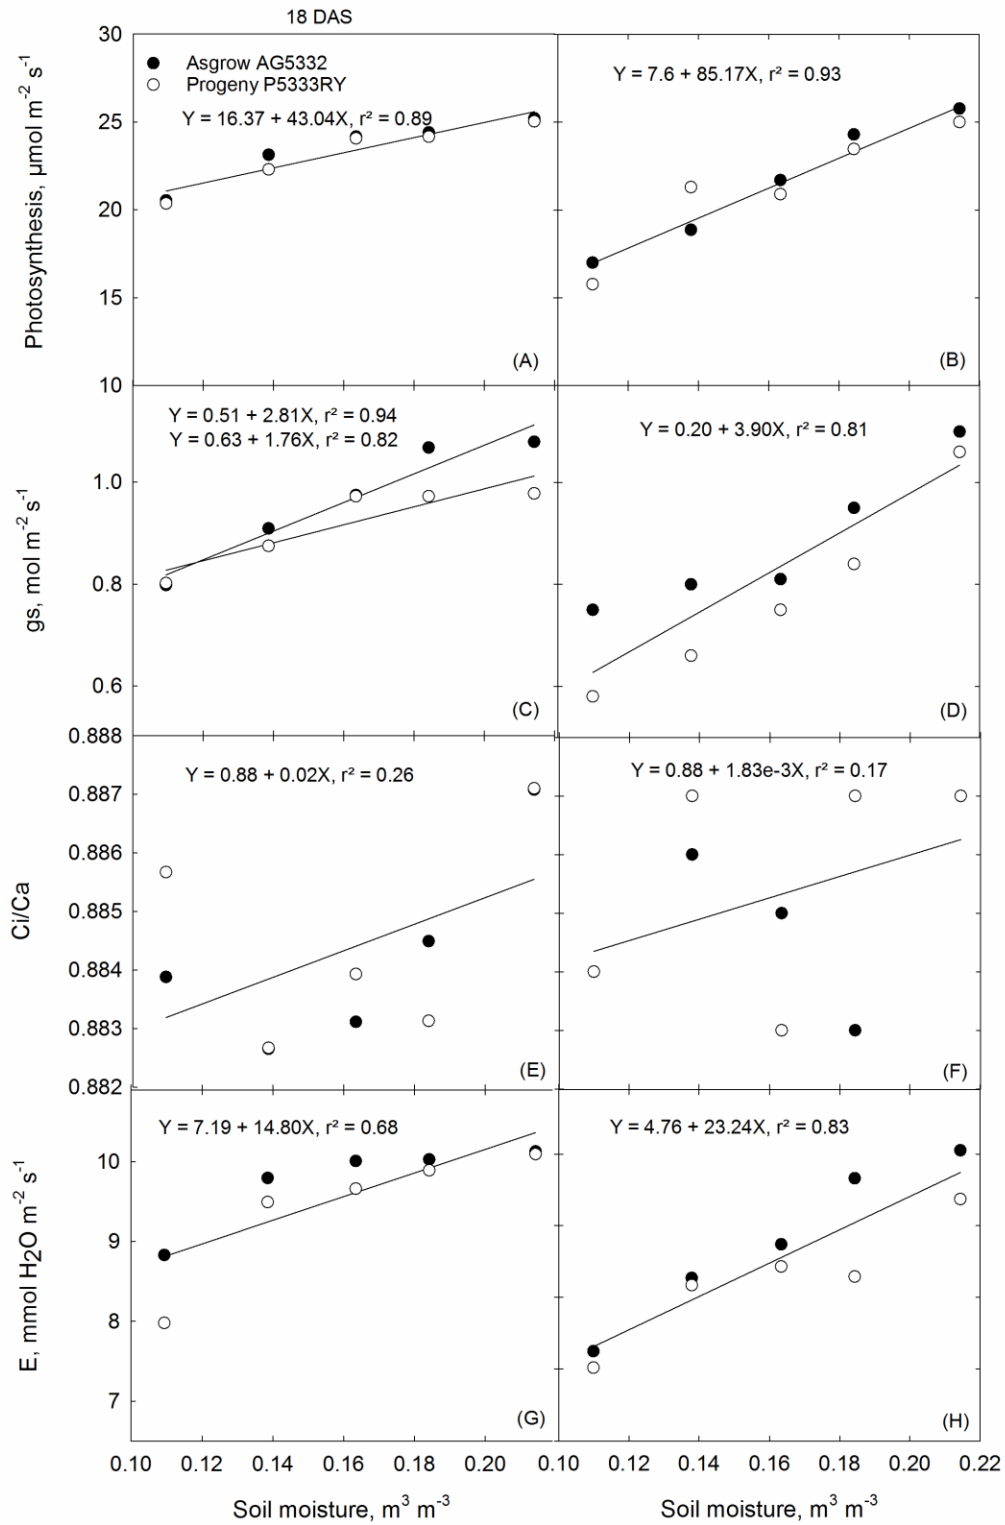

Table S5. Relationships between soil moisture and photosynthetic parameters measured at 18 and 30DAS. (A and B) photosynthesis, (C and D) stomatal conductance, (E and F) internal to external  $\text{CO}_2$  concentration, and (G and H) transpiration.

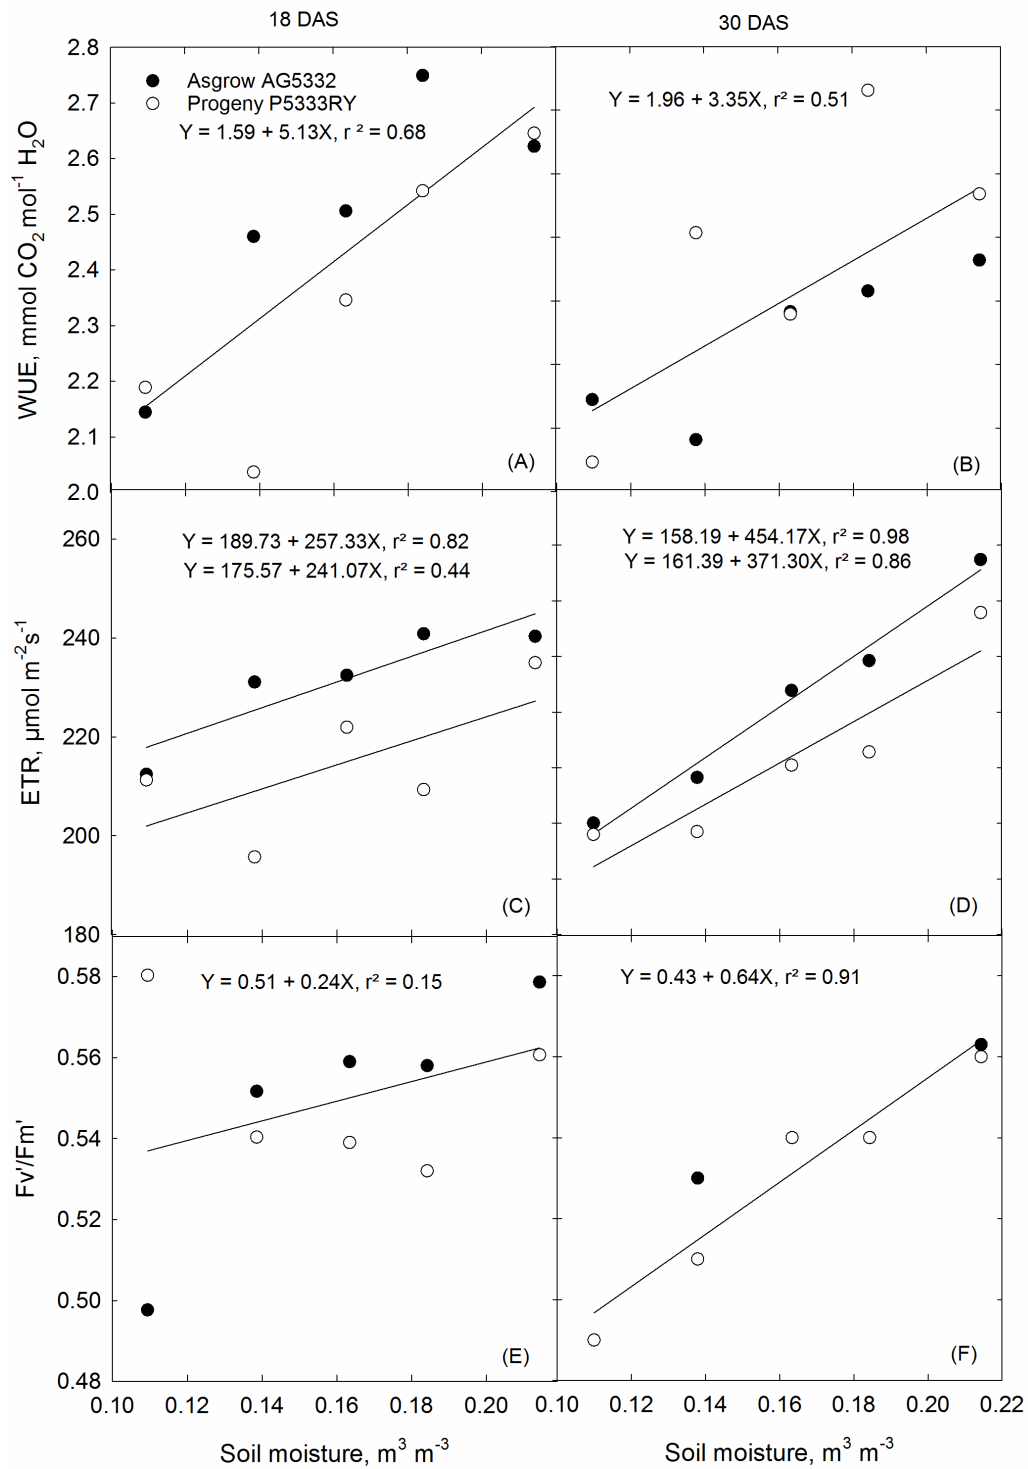

Table S6. Relationships between soil moisture and gas exchange parameters measured at 18 and 30DAS. (A and B) water use efficiency, (C and D) electron transport rate, and (E and F) chlorophyll fluorescence.
